# Supplementary material for: Impact of multiple H/D replacements on the physicochemical properties of flurbiprofen
Source: Royal Society of Chemistry journal article supplement (doi:10.1039/d3md00357d), 2023-01-01
Supplement: d3md00357d1.pdf [file d3md00357d1.pdf]

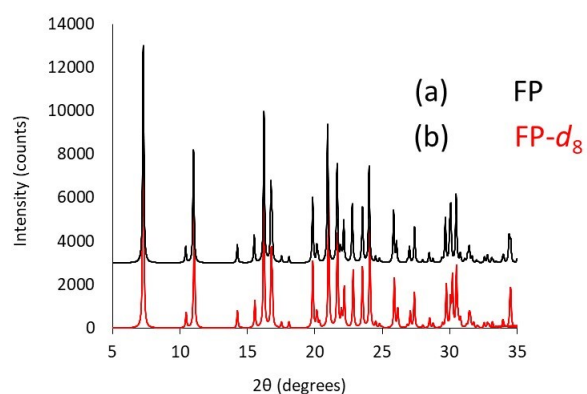

Figure S2 Powder X-ray diffraction (PXRD) patterns of flurbiprofen (FP) and flurbiprofen- $d_8$  (FP- $d_8$ ) from before recrystallization, (b) after recrystallization and (c) simulated single-crystal pattern.

### Method

The Powder X-ray diffraction patterns of the powder samples were determined using an X-ray diffractometer (Miniflex; Rigaku Corporation, Tokyo, Japan) equipped with a split-detector and a Cu-K $\alpha$  radiation source (30 kV, 15 mA, and  $\lambda = 0.15418$  nm). The scanning rate was  $2^\circ/\text{min}$  over a  $2\theta$  range of  $5\text{--}35^\circ$ .

Figure S3

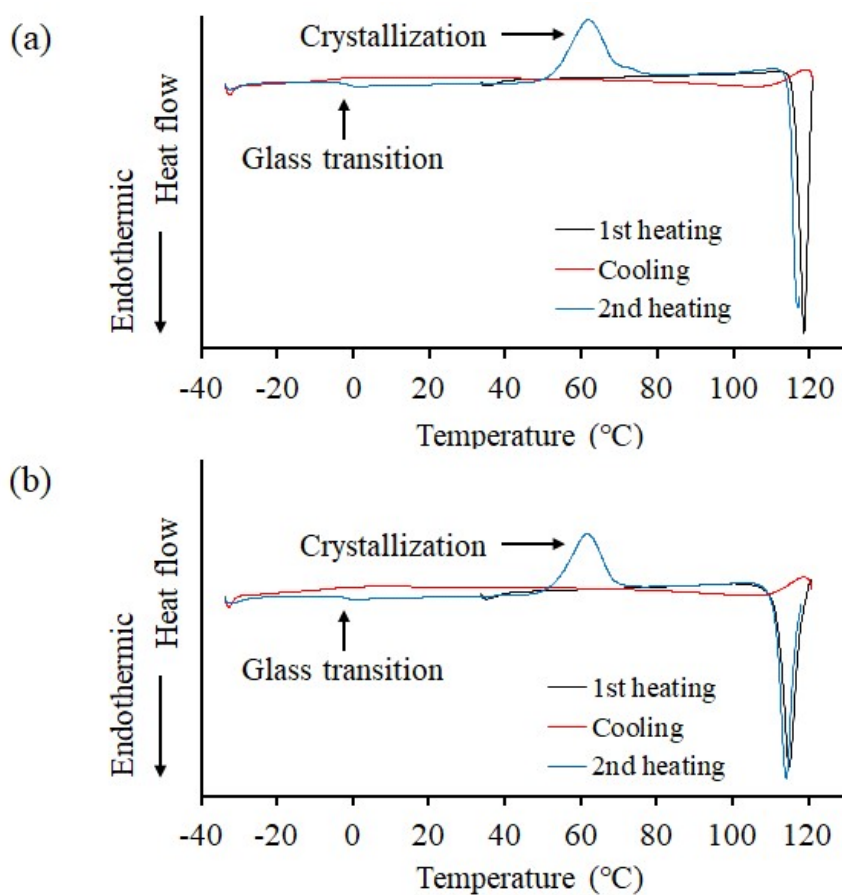

Figure S3 Differential scanning calorimetry (DSC) thermograms of (a) flurbiprofen (FP) and (b) flurbiprofen- $d_8$  (FP- $d_8$ ). The black line represents the first heating, blue line is the cooling profile, and the red line shows the second heating profile.

### Method

DSC measurements were carried out with Hitachi DSC7000X (Hitachi High-Tech Science Corporation, Tokyo, Japan), and the cell was purged by nitrogen at a flow rate of 50 mL/min. For the evaluation of crystallization tendency, about 3 mg of the powders were put into aluminum pans. The samples were heated above melting temperature with the heating rate of 10°C/min and isothermally held for 3 min. The molten samples were cooled below -20°C with the cooling rate of 20°C/min and held for 5 min. The samples were reheated to above the melting temperature with a heating rate of 10°C/min.

Figure S4

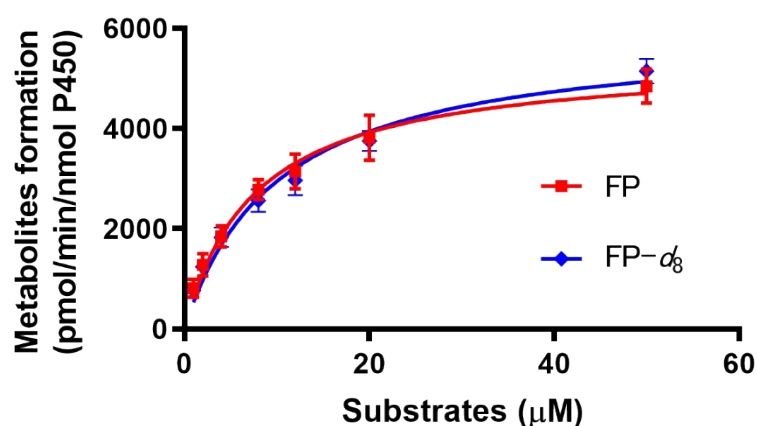

Figure S4 Michaelis-Menten plots of 4'-hydroxylation of flurbiprofen (FP) and flurbiprofen- $d_8$  (FP- $d_8$ )

Supplemental Table S1

Table S1 Kinetic parameters of 4'-hydroxylation of flurbiprofen (FP) and flurbiprofen- $d_8$  (FP- $d_8$ )

| Substrate    | $K_m$ ( $\mu\text{M}$ ) | $V_{\text{max}}$<br>(pmol/min/nmol<br>P450) | $DV$ | Clearance<br>( $V_{\text{max}}/K_m$ )<br>( $\mu\text{L}/\text{min}/\text{nmol}$<br>P450) | $D(V/K)$ |
|--------------|-------------------------|---------------------------------------------|------|------------------------------------------------------------------------------------------|----------|
| Flurbiprofen | 7.67±0.72               | 5423±427                                    | -    | 712.5±96.1                                                                               | -        |

|                 |            |          |             |            |             |
|-----------------|------------|----------|-------------|------------|-------------|
| Flurbiprofen-d8 | 10.28±1.55 | 5957±313 | 0.911±0.069 | 587.0±69.1 | 1.243±0.341 |
|-----------------|------------|----------|-------------|------------|-------------|

## Method

Flurbiprofen 4'-hydroxylation activities by recombinant CYP2C9 were compared between FP and FP- $d_8$  as substrates by noncompetitive intermolecular method. In brief, the mixture (0.5 ml) containing either FP or FP- $d_8$  (1.0 - 50  $\mu$ M), 2.5 pmol of recombinant CYP2C9 (commercially available baculosomes coexpressing CYP2C9 and OR, Corning, Woburn, MA, USA) and an NADPH regenerating system were incubated at 37 °C for 10 min. Reactions were terminated by addition of 100  $\mu$ l of 94 % acetonitrile and 6% acetic acid, followed by centrifugation at 3,000 g for 10 min at 4°C. The supernatants were filtered through polytetra-fluoroethylene membrane filters of 0.2  $\mu$ m pore size (Millipore, Bedford, MA), and the aliquots (10  $\mu$ l) were applied onto a InertSustain AQ-C18 HP column (3.0  $\mu$ m; 2.1 x 100 mm, GL Sciences, Tokyo, Japan) kept at 40 °C. LC-MS analysis was performed using Fourier Transform mass spectrometry (Q Exactive, Thermo Fisher Scientific). The kinetic parameters such as  $K_m$ ,  $V_{max}$ , and intrinsic clearance ( $V_{max}/K_m$ ) were estimated using a computer program designed for non-linear regression analysis of a hyperbolic Michaelis-Menten equation (Prism v.9, GraphPad Software, San Diego, CA, USA). Each value represents the mean  $\pm$  S.D. of four separate experiments.
